# Supplementary material
Source: PubMed Central journal article supplement (PMC6498457)
Supplement: nut121434sf1.pdf [file nut121434sf1.pdf]

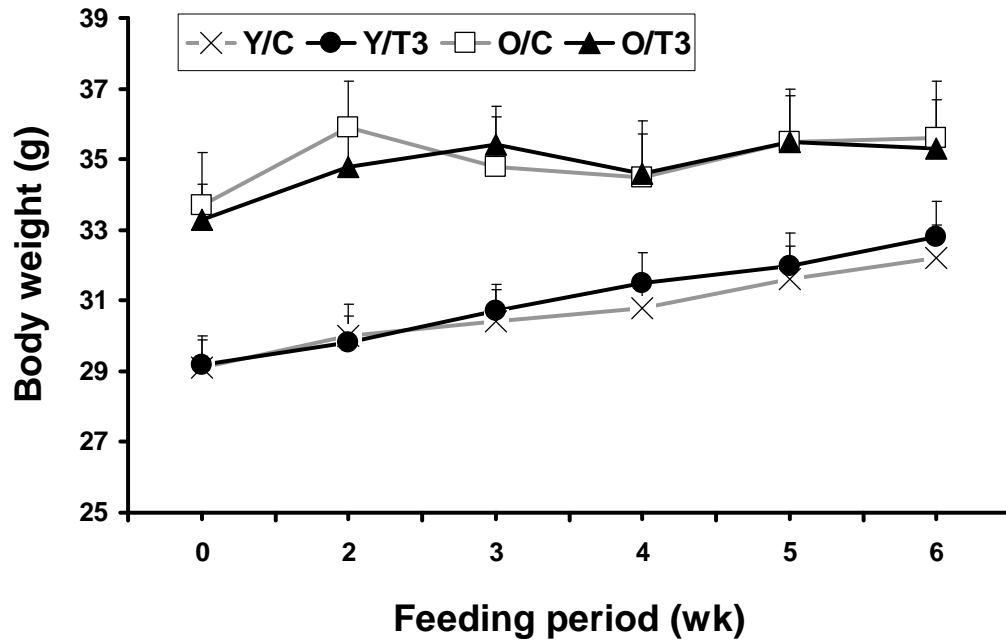

**Supplemental Figure 1.** Body weights of young and old mice fed control or T3 diet for 6 wk. Values are mean  $\pm$  SE,  $n = 13$ . There was a significant age effect and significant age  $\times$  time interaction by repeated measures ANOVA ( $P < 0.0001$ ) while no diet effect was detected. Y/C: young control; Y/T3: young T3; O/C: old control; O/T3: old T3.
