# Supplementary material
Source: PubMed Central journal article supplement (PMC6498457)
Supplement: nut121434st1.pdf [file nut121434st1.pdf]

**Supplemental Table 1.** Effect of dietary supplementation with T3 on spleen cell phenotype of young and old mice<sup>1,2</sup>

|               | Young     |           | Old       |           | P-values |       |        |
|---------------|-----------|-----------|-----------|-----------|----------|-------|--------|
|               | Control   | T3        | Control   | T3        | Age      | T3    | Age×T3 |
|               | %         |           |           |           |          |       |        |
| Total T cells | 49 ± 1.7  | 49 ± 1.1  | 32 ± 2.7  | 28 ± 1.3  | <0.001   | 0.384 | 0.269  |
| CD4           | 47 ± 1.1  | 49 ± 1.3  | 48 ± 4.9  | 52 ± 2.3  | 0.695    | 0.195 | 0.464  |
| CD4 naïve     | 32 ± 1.7  | 31 ± 1.6  | 16 ± 1.5  | 18 ± 2.2  | <0.001   | 0.628 | 0.420  |
| CD4 memory    | 68 ± 1.8  | 69 ± 1.6  | 84 ± 1.5  | 82 ± 2.2  | <0.001   | 0.686 | 0.328  |
| CD8           | 45 ± 1.1  | 43 ± 1.1  | 46 ± 5.7  | 42 ± 3.1  | 0.432    | 0.487 | 0.992  |
| CD8 naïve     | 38 ± 4.4  | 36 ± 2.6  | 19 ± 4.3  | 19 ± 3.5  | <0.001   | 0.733 | 0.758  |
| CD8 memory    | 62 ± 4.4  | 64 ± 2.5  | 81 ± 4.2  | 81 ± 3.4  | <0.001   | 0.610 | 0.737  |
| B cells       | 39 ± 2.4  | 37 ± 1.7  | 56 ± 3.6  | 57 ± 5.0  | <0.001   | 0.667 | 0.814  |
| Mφ            | 6.9 ± 0.8 | 7.0 ± 0.3 | 7.3 ± 1.1 | 6.3 ± 0.7 | 0.443    | 0.914 | 0.496  |
| NK            | 3.2 ± 0.3 | 3.2 ± 0.2 | 3.3 ± 0.5 | 3.0 ± 0.5 | 0.300    | 0.746 | 0.660  |
| Treg          | 3.6 ± 0.3 | 3.9 ± 0.2 | 2.9 ± 0.3 | 2.9 ± 0.2 | <0.001   | 0.141 | 0.959  |

<sup>1</sup>Values are mean ± SE, n=10-13/group. <sup>2</sup>Percentages of CD4 and CD8 T cells are expressed as within T cell population; naïve and memory subsets are within CD4 and CD8 T cell population, respectively.
